# Supplementary material for: Activation of Gossypium hirsutum ACS6 Facilitates Fiber Development by Improving Sucrose Metabolism and Transport
Source: MDPI journal article supplement (doi:10.3390/plants12203530), 2023-10-11
Supplement: s1 [file s1]

## Supplementary Table S1: The primer used in this study.

| Primer Name        | Sequence (5'-3')     |
|--------------------|----------------------|
| <i>GhACS6.3-F</i>  | CCTGGTTTCAGAGTCGGCAT |
| <i>GhACS6.3-R</i>  | ATGCTGAGTTTGCGAGGACA |
| <i>GhACS10.1-F</i> | AGCCTGCTAGACTTTGCCAG |
| <i>GhACS10.1-R</i> | CGATTTCTGCCATGCTCACG |
| <i>GhMML3-F</i>    | ATCGACCCTGCAACTCACAG |
| <i>GhMML3-R</i>    | TCGAGGCATTGCGGTTTAGT |
| <i>GhMML4-F</i>    | TTGAACGATGTGGGAAGAGC |
| <i>GhMML4-R</i>    | GGAGGTTGAGGGCTTGTGAG |
| <i>GhMML7-F</i>    | CTGGTTCGTGAGTCCAAGCT |
| <i>GhMML7-R</i>    | GCCATGCTTTGAGTACGTCG |
| <i>GhSUT1-F</i>    | TATCAACCCGGCACCAGTC  |
| <i>GhSUT1-R</i>    | GCCAAATGAAAGCAGCCCAA |
| <i>GhSUT2-F</i>    | CACCACCACGAAAGCTTGTG |
| <i>GhSUT2-R</i>    | AGGTTACCGGCATTTCCAGG |
| <i>GhSWEET2-F</i>  | TCACTGTTCAGTGCGATGCT |
| <i>GhSWEET2-R</i>  | AGACAAGTCCGAACCCGAAA |
| <i>GhSWEET5-F</i>  | ATCGGCTCAGCAAGTAGTCG |
| <i>GhSWEET5-R</i>  | CGGTTCCGTCACCATTGTTG |
| <i>GhSuSy1-F</i>   | GATTCCACACTTACCGCCCA |
| <i>GhSuSy1-R</i>   | GATGGCTTCCTGACTGGCTT |
| <i>GhSuSy3-F</i>   | ATCAGCGGCTGGAAAGAGTC |
| <i>GhSuSy3-R</i>   | CGTCCTCCGCATAAGTCTCC |
| <i>GhUBQ7-F</i>    | CGGCAAGCAACTCGAAGATG |
| <i>GhUBQ7-R</i>    | GACAGCGAGCTTGACCTTCT |

Supplementary Figure S1 Expression profiles of *GhACS*s in leaves, root, stem, torus, stamen, pistil, petal and calycle.

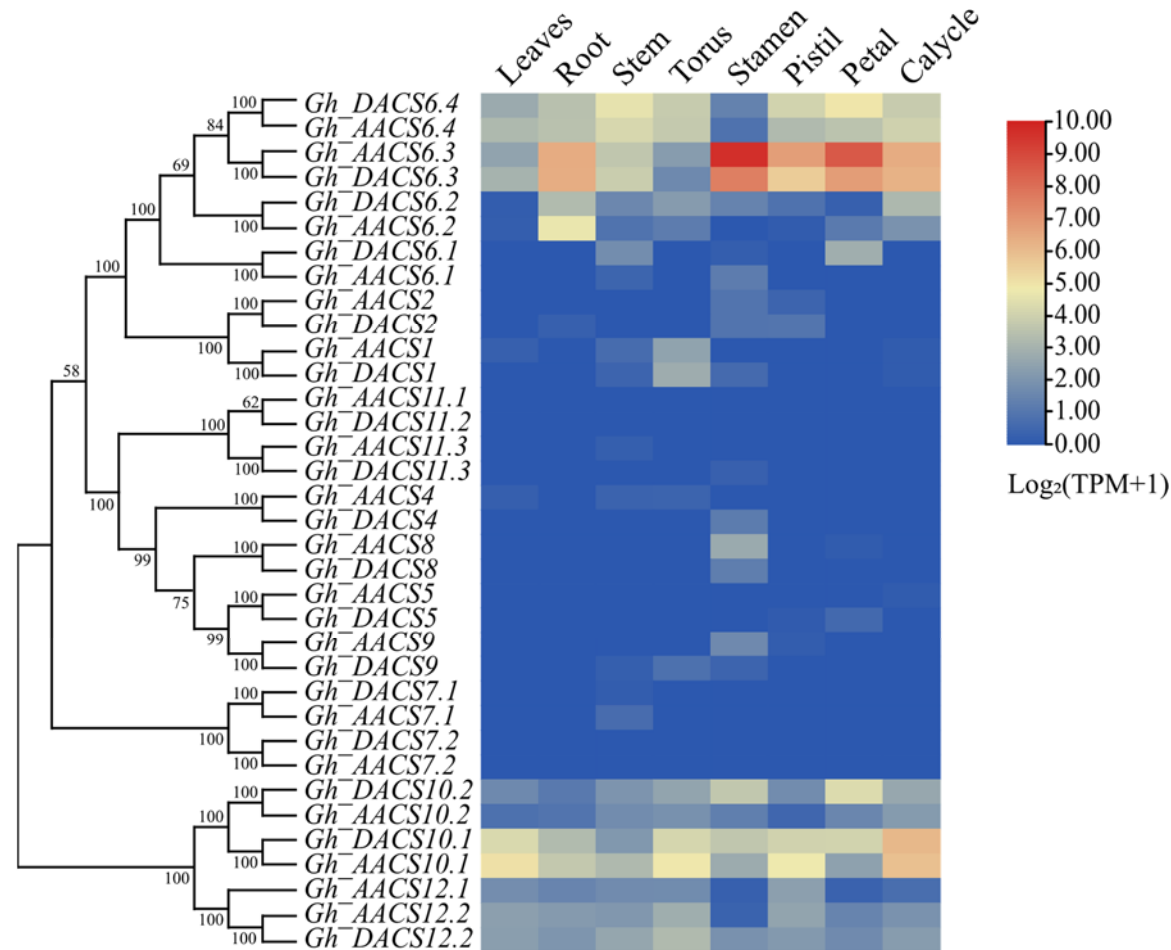

**Supplementary Figure S1:** Expression profiles of *GhACS*s in leaves, root, stem, torus, stamen, pistil, petal and calycle.

Phylogenetic analysis of 35 *GhACS*s in *G. hirsutum* were used to construct the neighbor-joining tree using MEGA 7.0 software. Heatmap generated from RNA-seq data (SRA:PRJNA248163) of *GhACS*s in leaves, root, stem, torus, stamen, pistil, petal and calycle of *G. hirsutum*. Different columns in the figure represent various samples, and rows represent genes.

Supplementary Figure S2: The size of culture ovules with ACC treatment.

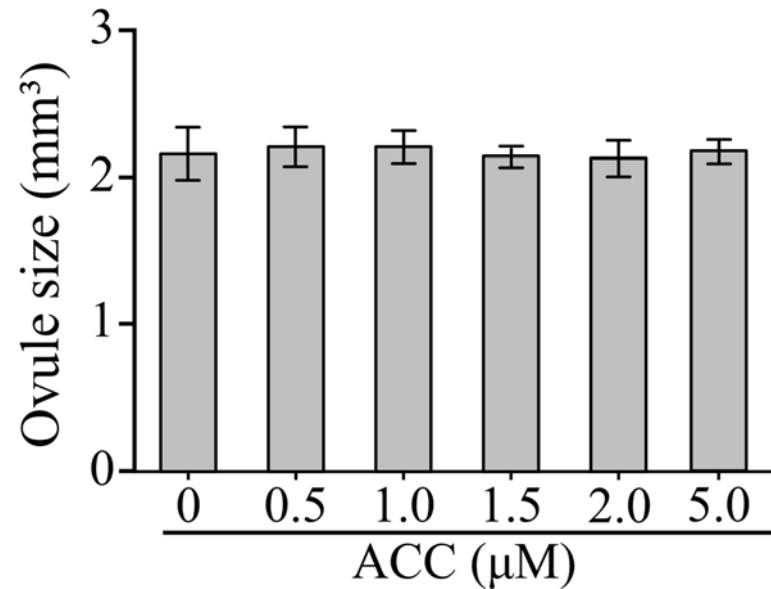

**Supplementary Figure S2:** The size of culture ovules with ACC treatment. Statistics of the size of ovules cultured in vitro for 48 h with 0, 0.5, 1.0, 1.5, 2.0 and 5.0 μM ACC treatment.

Differences between groups were compared using Student's *t*-test (\*,  $P < 0.05$ , \*\*,  $P < 0.01$ ).

Experiments were repeated five times with similar results, Error bars represent  $\pm$  SD.

Supplementary Figure S3: Expression profile of *GhSUTs* and *GhSWEETs* in ovules and leaves.

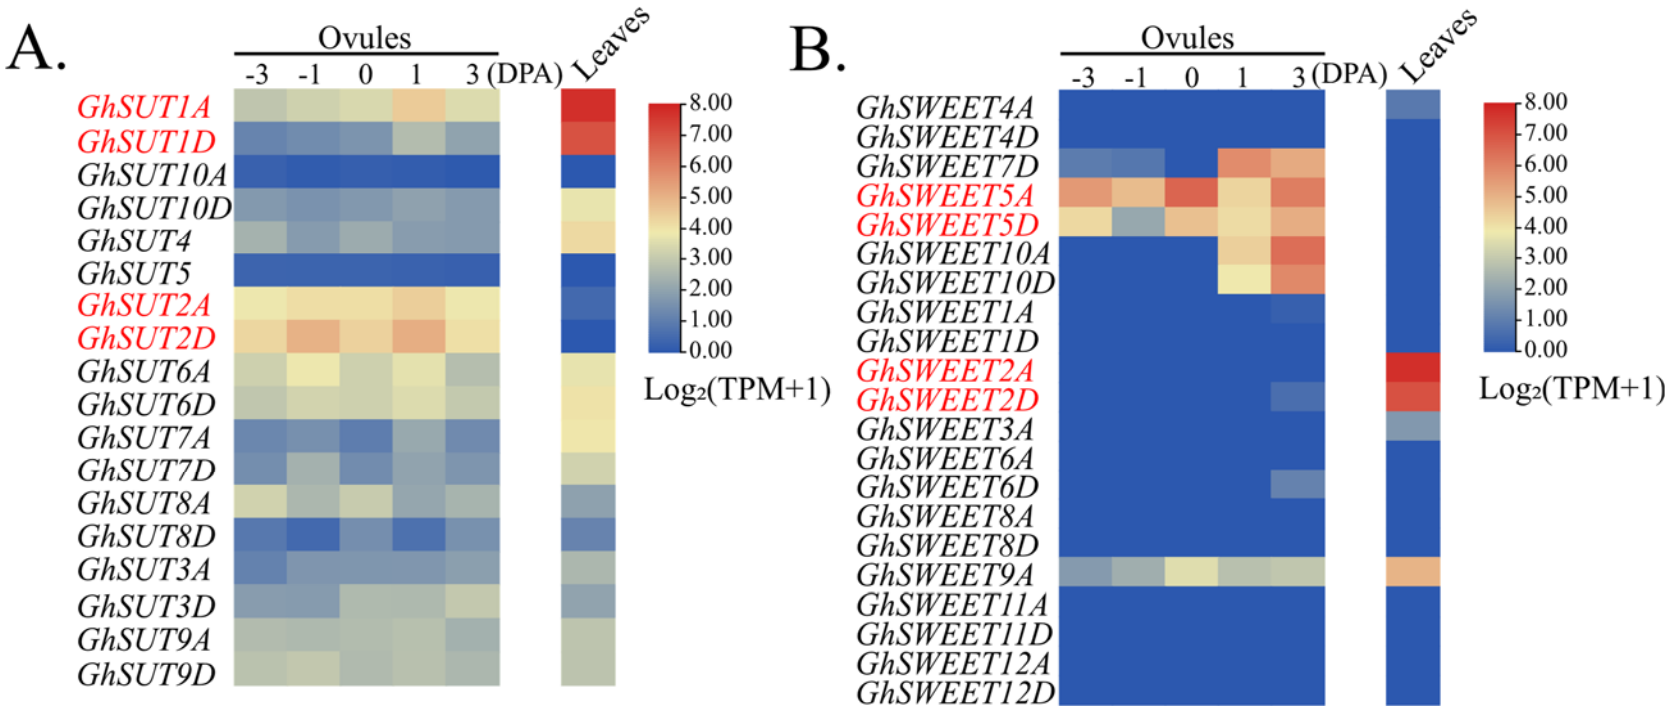

**Supplementary Figure S3** Expression profiles of *GhSUTs* and *GhSWEETs* in ovules during fiber initiation and in leaves. **A and B.** Expression profile of *GhSUTs* and *GhSWEETs* in ovules at -3, -1, 0, 1 and 3 DPA developmental stages and in leaves of *G. hirsutum*. Heatmap generated from RNA-seq data (SRA:PRJNA248163). The color represents the level of expression of the gene ( $\log_2(\text{TPM}+1)$ ) in the sample.

Supplementary Figure S4: Expression profile of *GhSuSy* in ovules and leaves.

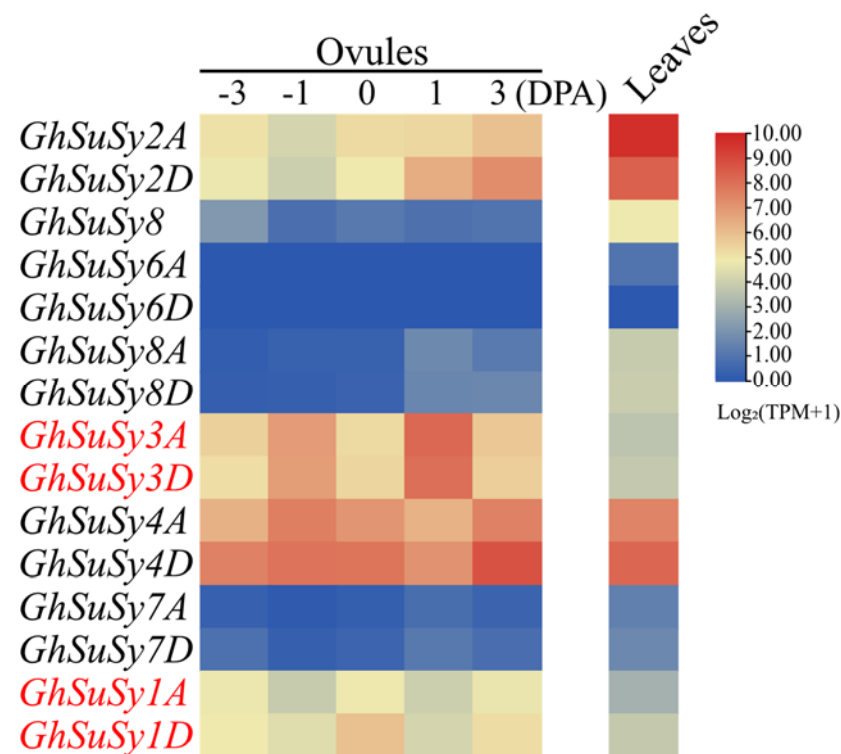

**Supplementary Figure S4:** Expression profile of *GhSuSy* in ovules and leaves during fiber initiation.

Heatmap generated from RNA-seq data (SRA:PRJNA248163) of *GhSuSy* in ovules at -3, -1, 0, 1 and 3 DPA developmental stages and in leaves of *G. hirsutum*. Different columns in the figure represent various samples, and rows represent genes. The color represents the level of expression of the gene ( $\log^2(\text{TPM}+1)$ ) in the sample.

Supplementary Figure S5: Fructose content in ovules of the *GhACS6.3*-OE lines.

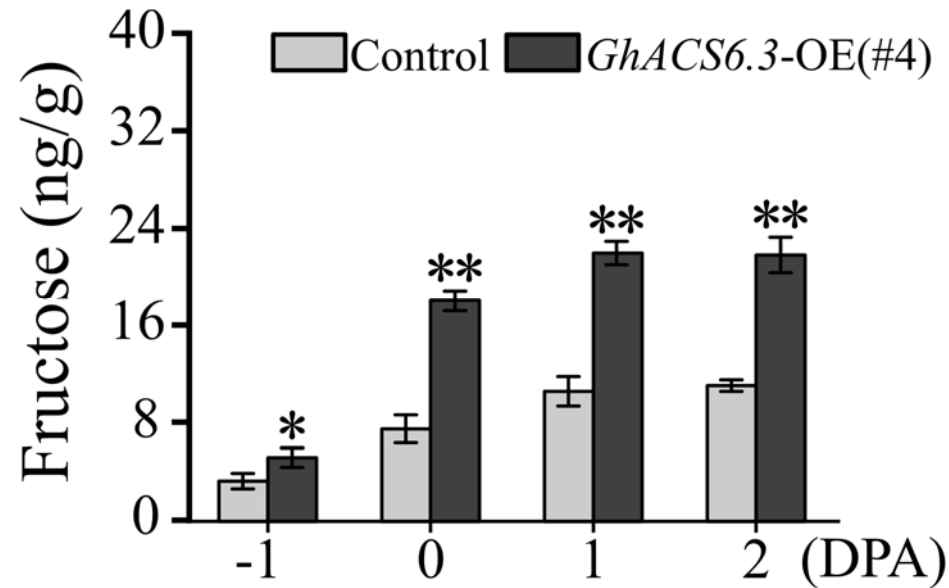

**Supplementary Figure S5:** Fructose content in ovules of the *GhACS6.3*-OE lines.

HPLC analysis fructose in ovules at -1 to 2 DPA development stages of the control and *GhACS6.3*-OE(#4) lines.

Differences between groups were compared using Student's *t*-test (\*,  $P < 0.05$ , \*\*,  $P < 0.01$ ). Experiments

were repeated three times with similar results, Error bars represent  $\pm$  SD.
